# Supplementary material
Source: publisher site journal article supplement (https://www.spandidos-publications.com/6911/downloadSupplementary)
Supplement: Supplementary file 1 [file downloadSupplementary]

## Sheet: hematopoietic-related DEGs
Table SI. Hematopoietic-related DEGs.
Model Vs Control	ID	Term	GeneRatio	BgRatio	enrich_factor	pvalue	qvalue	geneID	gene_name	Count	regulated
	GO:0030097	hemopoiesis	8/448	63/15028	4.26	0.000538973	0.0698742	ENSMUSG00000022540/ENSMUSG00000024986/ENSMUSG00000026648/ENSMUSG00000030427/ENSMUSG00000040560/ENSMUSG00000050377/ENSMUSG00000055148/ENSMUSG00000074417	Rogdi;Hhex;Dclre1c;Lilra6;Wdr7;Il31ra;Klf2;Gm14548	8	up
	GO:0035166	post-embryonic hemopoiesis	1/448	3/15028	11.18	0.0867991	0.231861	ENSMUSG00000003032	Klf4	1	up
						Model Vs Control		9	ENSMUSG00000003032;ENSMUSG00000022540;ENSMUSG00000024986;ENSMUSG00000026648;ENSMUSG00000030427;ENSMUSG00000040560;ENSMUSG00000050377;ENSMUSG00000055148;ENSMUSG00000074417
Model Vs GE	ID	Term	GeneRatio	BgRatio	enrich_factor	pvalue	qvalue	geneID	gene_name	Count	regulated
	GO:0030097	hemopoiesis	8/869	63/15028	2.2	0.0280417	0.177281	ENSMUSG00000022335/ENSMUSG00000022952/ENSMUSG00000024986/ENSMUSG00000027684/ENSMUSG00000037902/ENSMUSG00000042594/ENSMUSG00000053175/ENSMUSG00000066687	Zfat;Runx1;Hhex;Mecom;Sirpa;Sh2b3;Bcl3;Zbtb16	8	up
	GO:0035162	embryonic hemopoiesis	2/869	5/15028	6.92	0.029711	0.177281	ENSMUSG00000002028/ENSMUSG00000052534	Kmt2a;Pbx1	2	up
	GO:0035166	post-embryonic hemopoiesis	1/869	3/15028	5.76	0.163648	0.272682	ENSMUSG00000003032	Klf4	1	up
	GO:0060216	definitive hemopoiesis	1/869	6/15028	2.88	0.300542	0.366601	ENSMUSG00000002028	Kmt2a	1	up
	GO:1903706	regulation of hemopoiesis	8/869	37/15028	3.74	0.00104244	0.0411424	ENSMUSG00000035356/ENSMUSG00000037465/ENSMUSG00000042677/ENSMUSG00000044258/ENSMUSG00000052040/ENSMUSG00000052713/ENSMUSG00000074874/ENSMUSG00000112023	Nfkbiz;Klf10;Zc3h12a;Ctla2a;Klf13;Zfp608;Ctla2b;Lilr4b	8	up
	GO:1903707	negative regulation of hemopoiesis	4/869	16/15028	4.32	0.0115552	0.114704	ENSMUSG00000042677/ENSMUSG00000052040/ENSMUSG00000052713/ENSMUSG00000112023	Zc3h12a;Klf13;Zfp608;Lilr4b	4	up
	GO:1903708	positive regulation of hemopoiesis	3/869	13/15028	3.99	0.0356513	0.177863	ENSMUSG00000035356/ENSMUSG00000037465/ENSMUSG00000112023	Nfkbiz;Klf10;Lilr4b	3	up
						Model Vs GE		19	ENSMUSG00000002028;ENSMUSG00000003032;ENSMUSG00000022335;ENSMUSG00000022952;ENSMUSG00000024986;ENSMUSG00000027684;ENSMUSG00000035356;ENSMUSG00000037465;ENSMUSG00000037902;ENSMUSG00000042594;ENSMUSG00000042677;ENSMUSG00000044258;EENSMUSG00000052040;ENSMUSG00000052534;ENSMUSG00000052713;NSMUSG00000053175;ENSMUSG00000066687;ENSMUSG00000074874;ENSMUSG00000112023
Model Vs TG	ID	Term	GeneRatio	BgRatio	enrich_factor	pvalue	qvalue	geneID	gene_name	Count	regulated
	GO:0030097	hemopoiesis	14/1269	63/15028	2.63	0.000636562	0.0318591	ENSMUSG00000022335/ENSMUSG00000022952/ENSMUSG00000027506/ENSMUSG00000027684/ENSMUSG00000028076/ENSMUSG00000037846/ENSMUSG00000037902/ENSMUSG00000042594/ENSMUSG00000042817/ENSMUSG00000044813/ENSMUSG00000053175/ENSMUSG00000059305/ENSMUSG00000061132/ENSMUSG00000089942	Zfat;Runx1;Tpd52;Mecom;Cd1d1;Rtkn2;Sirpa;Sh2b3;Flt3;Shb;Bcl3;Vpreb1;Blnk;Pira2	14	up
	GO:0035162	embryonic hemopoiesis	2/1269	5/15028	4.74	0.0599797	0.234132	ENSMUSG00000002028/ENSMUSG00000052534	Kmt2a;Pbx1	2	up
	GO:0035166	post-embryonic hemopoiesis	1/1269	3/15028	3.95	0.232552	0.358864	ENSMUSG00000003032	Klf4	1	up
	GO:0060216	definitive hemopoiesis	1/1269	6/15028	1.97	0.411056	0.478663	ENSMUSG00000002028	Kmt2a	1	up
	GO:1903706	regulation of hemopoiesis	7/1269	37/15028	2.24	0.0329444	0.222355	ENSMUSG00000028076/ENSMUSG00000040524/ENSMUSG00000044258/ENSMUSG00000052040/ENSMUSG00000052713/ENSMUSG00000074874/ENSMUSG00000112023	Cd1d1;Zfp609;Ctla2a;Klf13;Zfp608;Ctla2b;Lilr4b	7	up
	GO:1903707	negative regulation of hemopoiesis	3/1269	16/15028	2.22	0.147592	0.301619	ENSMUSG00000052040/ENSMUSG00000052713/ENSMUSG00000112023	Klf13;Zfp608;Lilr4b	3	up
	GO:1903708	positive regulation of hemopoiesis	3/1269	13/15028	2.73	0.0907163	0.246287	ENSMUSG00000028076/ENSMUSG00000040524/ENSMUSG00000112023	Cd1d1;Zfp609;Lilr4b	3	up
						Model Vs TG		23	ENSMUSG00000002028;ENSMUSG00000003032;ENSMUSG00000022335;ENSMUSG00000022952;ENSMUSG00000027506;ENSMUSG00000027684;ENSMUSG00000028076;ENSMUSG00000037846;ENSMUSG00000037902;ENSMUSG00000040524;ENSMUSG00000042594;ENSMUSG00000042817;ENSMUSG00000044258;ENSMUSG00000044813;ENSMUSG00000052040;ENSMUSG00000052534;ENSMUSG00000052713;ENSMUSG00000053175;ENSMUSG00000059305;ENSMUSG00000061132;ENSMUSG00000074874;…
Model Vs TP	ID	Term	GeneRatio	BgRatio	enrich_factor	pvalue	qvalue	geneID	gene_name	Count	regulated
	GO:0030097	hemopoiesis	1/47	63/15028	5.08	0.179425	0.206811	ENSMUSG00000040560	Wdr7	1	up
						Model Vs TP		1	ENSMUSG00000040560
Total	35	ENSMUSG00000002028;ENSMUSG00000003032;ENSMUSG00000022335;ENSMUSG00000022540;ENSMUSG00000022952;ENSMUSG00000024986;ENSMUSG00000026648;ENSMUSG00000027506;ENSMUSG00000027684;ENSMUSG00000028076;ENSMUSG00000030427;ENSMUSG00000035356;ENSMUSG00000037465;ENSMUSG00000037846;ENSMUSG00000037902;ENSMUSG00000040524;ENSMUSG00000040560;ENSMUSG00000042594;ENSMUSG00000042677;ENSMUSG00000042817;ENSMUSG00000044258;…
	#ID	Symbol	a1	a3	a4	a5	b1	b2	b3		b5	c1	c2	c3	c4	c5	d1	d2	d3	d4	d5	e1	e2	e3	e4	e5
1	ENSMUSG00000002028	Kmt2a	6.92072	7.90153	8.44186	7.28639	7.51543	12.387	9.8106		7.27204	16.9025	14.0148	11.6853	16.2401	18.2963	24.1138	13.7919	22.8483	18.1746	10.209	8.39226	9.15268	7.4923	6.4605	8.17434	7.63762	0.581756	9.24628	2.06617	15.4278	2.3266	17.8275	5.27586	7.93442	0.907661
2	ENSMUSG00000053175	Bcl3	2.49357	10.3011	2.1541	6.04482	14.6583	20.6519	20.383		14.7286	31.0835	32.2197	21.1683	35.2314	41.5226	48.2836	21.4424	47.758	31.0609	31.2499	23.1391	15.7891	13.2513	2.35011	3.83408	5.2484	3.2912	17.6055	2.91366	32.2451	6.61871	35.959	10.4691	11.6727	7.73653
3	ENSMUSG00000061132	Blnk	2.47336	4.90798	4.0406	2.60561	1.82078	7.60232	3.27956		2.79411	2.94361	3.77144	5.55805	2.40275	8.44523	14.1534	5.54438	10.5453	6.55609	5.64283	4.71462	4.18829	1.95155	3.07583	1.51855	3.50689	1.01592	3.87419	2.2156	4.62421	2.18901	8.4884	3.3711	3.08977	1.2338
4	ENSMUSG00000028076	Cd1d1	5.82906	8.02967	4.76598	6.11741	6.9593	4.27363	6.45255		8.04123	8.50137	9.03439	6.92569	10.0581	6.60532	10.7758	8.78939	12.2572	11.8666	6.3444	6.70504	5.77164	4.39527	1.36326	3.99738	6.18553	1.17768	6.43168	1.37174	8.22498	1.29641	10.0067	2.19134	4.44652	1.82031
5	ENSMUSG00000044258	Ctla2a	126.474	190.146	151.861	124.557	246.407	231.91	248.027		242.902	384.992	340.183	312.073	506.416	302.386	365.731	433.858	494.502	477.611	319.384	245.701	196.045	194.186	50.6773	115.322	148.26	26.4757	242.312	6.28463	369.21	74.3602	418.217	66.5048	160.386	68.934
6	ENSMUSG00000074874	Ctla2b	16.1569	37.008	12.4225	23.8866	41.3079	45.9493	41.8965		42.7181	91.9496	75.5907	62.6436	115.833	46.3515	83.1777	109.715	124.302	122.035	74.066	46.997	35.8573	31.6798	12.036	18.4245	22.3685	9.40914	42.9679	1.79269	78.4736	23.9501	102.659	20.4486	28.9989	12.4717
7	ENSMUSG00000026648	Dclre1c	6.86752	9.59812	6.33811	7.70589	5.59977	4.22269	5.23316		6.44845	4.62631	5.0846	5.78567	6.69909	4.77887	5.18766	3.76975	4.11806	5.43423	6.08622	5.57027	5.96446	4.98935	6.84204	7.28744	7.62741	1.2379	5.37602	0.798553	5.39491	0.764218	4.91918	0.85584	6.13071	0.835279
8	ENSMUSG00000042817	Flt3	14.9699	18.7245	12.0669	9.18431	21.0124	31.276	28.8711		33.4771	40.1186	40.412	45.1015	40.4245	26.6929	52.8669	27.5434	40.6673	43.343	41.2585	33.8106	23.0782	21.4362	5.92414	16.8414	13.7364	3.53238	28.6591	4.70581	38.5499	6.21217	41.1358	8.09293	20.2181	9.05692
9	ENSMUSG00000074417	Gm14548	0.928532	3.29216	1.59256	2.0304	0.643728	1.42841	1.14791		0.453279	0.557774	0.625571	0.346546	0.987386	1.90448	1.90904	1.0009	1.75673	1.38048	1.1264	0.697764	0.387164	0.334372	0.311945	0.550326	1.96091	0.862922	0.918332	0.38877	0.884351	0.550296	1.43471	0.350676	0.456314	0.146718
10	ENSMUSG00000024986	Hhex	48.5538	54.6806	55.6926	42.1048	31.148	29.2936	32.5601		42.3102	47.7121	48.3222	56.5046	60.8509	56.4087	52.2292	38.2138	34.104	58.8364	54.2828	39.3742	41.9212	48.311	14.4754	37.29	50.2579	5.44226	33.828	5.03235	53.9597	5.11423	47.5333	9.6184	36.2744	11.5118
11	ENSMUSG00000050377	Il31ra	1.94725	1.07537	1.22598	1.63282	0.404068	0.172973	0.321347		0.358882	0.405494	0.331985	0.554607	0.524524	0.336336	0.397673	0.234451	0.40273	0.806065	0.562191	0.388356	0.405802	0.279831	0.107919	0.388618	1.47036	0.342618	0.314317	0.0867018	0.430589	0.0932099	0.480622	0.192932	0.314105	0.112393
12	ENSMUSG00000037465	Klf10	19.0935	43.7817	20.6447	33.8444	46.1725	51.5767	61.7562		48.1543	79.5693	93.4077	87.15	100.676	73.0241	60.7008	54.5557	79.6515	83.5911	113.227	85.082	67.0122	57.9079	27.6411	25.9741	29.3411	10.1174	51.9149	6.00173	86.7654	9.7814	78.3452	20.6068	52.7234	22.9032
13	ENSMUSG00000052040	Klf13	9.73259	15.6356	6.50232	13.9998	26.2737	32.0643	30.5698		17.8869	38.6522	43.7775	38.3413	44.7155	42.2463	49.1586	40.8472	52.8009	56.8222	39.52	29.8536	34.186	27.1186	13.0166	12.1402	11.4676	3.58639	26.6987	5.51368	41.5466	2.6138	47.8298	6.71045	23.263	9.01463
14	ENSMUSG00000055148	Klf2	224.344	215.63	272.426	190.652	49.5085	76.4512	74.704		62.0387	73.4881	75.8369	99.0084	84.6415	56.0337	52.9107	66.5281	32.1953	70.0436	110.918	66.0538	69.6495	133.383	56.1913	129.677	225.763	29.6435	65.6756	10.8654	77.8017	14.0913	66.5192	25.8728	90.991	33.4127
15	ENSMUSG00000003032	Klf4	38.1829	20.8004	41.1783	36.8757	14.8798	24.8981	24.4834		14.1899	57.5373	60.7156	60.8365	61.2182	35.027	33.4818	45.1667	28.1917	43.3846	73.0414	42.1743	28.2059	39.0136	14.5289	22.3179	34.2593	7.92549	19.6128	5.08591	55.0669	10.1068	44.6532	15.5148	29.2481	10.2784
16	ENSMUSG00000112023	Lilr4b	8.84346	71.4327	10.8883	31.0038	15.9638	34.8551	34.984		15.4441	105.317	93.1692	43.7237	106.412	74.0576	171.055	62.0788	134.454	93.6288	47.1207	51.2257	16.2367	2.23715	2.43383	4.66538	30.5421	25.1464	25.3118	9.60969	84.536	23.4964	101.668	45.8189	15.3598	18.659
17	ENSMUSG00000030427	Lilra6	1.85586	4.96147	3.21776	2.42105	1.05924	1.58086	1.32086		0.601264	0.785873	0.585071	0.853784	0.651657	0.891075	2.18249	1.49747	2.30742	1.62757	1.16435	1.08176	0.412262	0.455659	0.125538	0.248267	3.11404	1.17122	1.14056	0.361879	0.753492	0.117279	1.75586	0.428799	0.464697	0.330292
18	ENSMUSG00000027684	Mecom	1.62731	2.00354	1.78377	0.682037	2.11401	2.88057	4.46714		2.67567	4.68177	5.95294	5.96685	6.0699	3.89439	4.21784	7.26739	7.05818	4.69919	2.39891	2.6185	1.68239	1.8996	0.889459	2.0175	1.52416	0.504236	3.03434	0.873528	5.31317	0.874166	5.1283	1.831	1.82149	0.559959
19	ENSMUSG00000035356	Nfkbiz	22.6411	71.1792	36.0322	46.7442	32.6456	32.1672	40.1428		65.1312	74.8822	59.7455	64.2741	68.8667	50.0633	53.7966	36.3126	79.2998	53.5838	77.8143	53.3433	47.3895	44.0186	21.1187	37.186	44.1492	17.7893	42.5217	13.4313	63.5664	8.40921	60.1614	16.3122	40.6112	11.0576
20	ENSMUSG00000052534	Pbx1	1.05038	1.44667	1.68602	1.11832	2.31384	2.98914	3.93309		0.952318	6.85424	7.1513	6.0069	8.06818	6.13998	4.00053	5.94762	5.40929	5.54848	4.05788	4.05737	2.82726	4.29143	1.74702	2.10842	1.32535	0.256548	2.54709	1.0856	6.84412	0.74693	4.99276	0.806549	3.0063	1.01787
21	ENSMUSG00000089942	Pira2	1.21087	2.19433	0.914558	1.68376	0.738833	1.85452	0.868346		0.754696	0.55959	1.58025	0.622762	0.889603	1.0175	2.42821	2.50058	1.74928	1.57458	1.53724	1.26682	0.573176	0.55814	0.169071	0.276623	1.50088	0.485333	1.0541	0.464816	0.933942	0.364318	1.95798	0.420262	0.568766	0.382756
22	ENSMUSG00000022540	Rogdi	7.4594	12.6277	9.04167	8.44296	4.3476	6.81914	7.92732		7.06936	6.40632	7.92666	8.53651	6.0773	8.20342	7.0485	6.5434	5.08713	6.63056	7.73622	8.61912	4.97273	8.76531	3.10851	5.09511	9.39292	1.95114	6.54086	1.3313	7.43004	0.99468	6.60916	0.870014	6.11216	2.22165
23	ENSMUSG00000037846	Rtkn2	0.411885	0.324941	0.435222	0.469023	0.237527	0.263581	0.377208		0.339602	0.67554	0.396381	0.894863	0.58722	0.35731	0.342479	0.474684	0.540094	0.615724	0.65409	0.443979	0.436091	1.17746	0.308924	0.401725	0.410268	0.0532873	0.30448	0.0562991	0.582263	0.195755	0.525414	0.110424	0.553636	0.315582
24	ENSMUSG00000022952	Runx1	9.49057	13.3603	13.3404	10.7632	16.4119	19.7135	17.813		13.3868	22.7	26.0491	23.7109	30.1003	37.1943	33.5217	29.8626	37.4371	38.2517	25.3841	17.5688	15.5161	15.4156	7.47981	11.3483	11.7386	1.67336	16.8313	2.30821	27.9509	5.27688	32.8914	4.80263	13.4657	3.60988
25	ENSMUSG00000042594	Sh2b3	10.0197	20.9997	9.06081	15.2309	38.3265	56.8304	49.4517		23.173	61.3352	61.4797	51.0793	81.8132	71.9556	94.476	65.5322	88.9451	88.9714	54.4449	37.4908	38.8211	26.6764	10.0126	11.4061	13.8278	4.76003	41.9454	12.6827	65.5326	10.481	78.4739	15.6256	24.8814	12.3223
26	ENSMUSG00000044813	Shb	1.78419	2.77996	1.78659	3.13392	3.55502	5.22888	4.75524		2.41383	4.8209	7.74271	4.69342	5.87222	5.86331	8.03452	4.54062	6.44607	7.99225	5.99371	3.84666	3.59699	3.9481	2.0119	1.25825	2.37116	0.598992	3.98824	1.09475	5.79851	1.09238	6.60143	1.31366	2.93238	1.09172
27	ENSMUSG00000037902	Sirpa	4.28777	8.57562	3.17346	6.6406	4.27802	5.08254	4.70506		6.95824	9.34515	9.30053	7.2752	9.73538	7.22064	13.2943	7.38558	15.712	9.73428	6.86336	6.10365	3.4404	4.351	1.87229	3.28691	5.66936	2.09332	5.25596	1.02319	8.57538	1.09451	10.5979	3.41866	3.81085	1.39416
28	ENSMUSG00000027506	Tpd52	2.4827	4.61218	2.18105	3.17321	3.30686	6.32125	4.73515		5.55497	5.51251	6.28286	5.8426	6.63416	5.66712	8.98025	7.3756	7.43689	7.93178	6.30021	6.20117	3.10523	3.64452	1.28063	1.92527	3.11228	0.937679	4.97956	1.11679	5.98785	0.413439	7.60495	0.869652	3.23137	1.70397
29	ENSMUSG00000059305	Vpreb1	2.36083	12.3921	0.838144	4.70788	3.08298	2.26284	1.69829		2.71803	1.51389	3.73818	2.54915	0.476462	1.26184	4.57116	6.57482	4.91818	4.01623	3.1461	1.18737	0.786081	0.805406	1.11949	0.612009	5.07473	4.44388	2.44054	0.517746	1.9079	1.12985	4.6453	1.13546	0.902071	0.217071
30	ENSMUSG00000040560	Wdr7	4.71672	3.34357	3.26397	4.2249	2.72194	2.94245	1.42916		2.77156	2.714	1.98031	3.09731	2.61117	1.93934	1.20209	3.00514	1.34556	1.97471	3.26913	3.17984	3.78935	3.5627	5.31784	3.88386	3.88729	0.609526	2.46628	0.60434	2.46842	0.445951	2.15933	0.84376	3.94672	0.727222
31	ENSMUSG00000066687	Zbtb16	1.61696	1.42297	1.52858	1.39197	1.42404	1.67375	2.16156		1.52974	2.98476	3.24008	3.78728	3.149	2.68438	1.25537	2.62777	4.6555	3.12694	2.52219	1.76142	1.42627	1.62778	0.349108	1.40753	1.49012	0.0890367	1.69727	0.282329	3.1691	0.362362	2.83755	1.09868	1.31442	0.500201
32	ENSMUSG00000042677	Zc3h12a	11.7473	25.8217	11.537	22.0087	21.354	19.2255	28.7459		30.6546	42.8842	39.4886	36.6593	43.5392	34.4313	33.8739	25.415	38.9861	33.8479	44.1645	27.0792	28.0678	23.3567	8.58756	16.9437	17.7787	6.2833	24.995	4.8126	39.4005	3.50656	35.2575	6.22916	20.807	7.24984
33	ENSMUSG00000022335	Zfat	1.0683	0.62524	1.44354	1.42602	1.28781	1.75147	1.30989		0.731542	1.92301	2.0209	1.89917	1.86044	2.79219	1.93916	2.07369	2.26086	2.04188	1.75152	2.01084	1.73172	1.21974	1.18386	1.37759	1.14078	0.333189	1.27018	0.361821	2.09914	0.35055	2.01342	0.1672	1.50475	0.318753
34	ENSMUSG00000052713	Zfp608	2.74689	7.20252	3.62804	4.20798	4.56951	6.2442	5.32992		8.57463	14.2807	15.4274	11.7239	15.6997	14.7386	15.6782	8.85701	16.0257	16.6067	9.35682	9.44349	7.98856	7.12119	1.96772	3.8183	4.44636	1.67415	6.17956	1.50455	14.3741	1.41644	13.3049	3.44406	6.06785	2.75917
35	ENSMUSG00000040524	Zfp609	4.9006	3.15111	5.48862	3.94189	4.46016	5.46719	4.46398		3.07767	6.34951	5.94832	5.10649	6.19479	6.7996	9.21299	7.15896	8.1443	7.74894	4.67292	4.20334	4.34658	3.75965	4.67472	5.95928	4.37055	0.894678	4.36725	0.850128	6.07974	0.560122	7.38762	1.51373	4.58871	0.745701
